# Supplementary material for: Associations between Trace Elements and Cognitive Decline: An Exploratory 5-Year Follow-Up Study of an Elderly Cohort
Source: PubMed Central journal article supplement (PMC7503463; doi:10.3390/ijerph17176051), 2020-08-20
Supplement: ijerph-17-06051-s001.pdf [file ijerph-17-06051-s001.pdf]

## Supplementary Materials

**Table S1.** Operating conditions for the iCAP™ Q ICP-MS instrument.

|                           |                         |
|---------------------------|-------------------------|
| Plasma gas flow rate      | 14 L/min                |
| Auxiliary gas flow rate   | 0.85 L/min              |
| Nebulizer gas flow rate   | 1.02 L/min              |
| RF power                  | 1550 W                  |
| Nebulizer                 | MicroMist™              |
| Spray chamber             | Baffled quartz cyclonic |
| Spray chamber temperature | 2.7 °C                  |
| Dwell time                | 20 ms*                  |
| Replicates                | 3                       |
| Sample uptake time        | 1 min                   |
| Washout time              | 2 min                   |

\* A dwell time of 50 ms was used for Hg.

**Table S2.** Limits of detection (LOD) for the analyzed trace elements.

| Element | LOD (µg/g) |
|---------|------------|
| Al      | 0.047      |
| As      | 0.032      |
| Ba      | 0.002      |
| Cd      | 0.001      |
| Co      | 0.001      |
| Cr      | 0.005      |
| Cu      | 0.006      |
| Fe      | 0.544      |
| Hg      | 0.022      |
| Li      | 0.001      |
| Mn      | 0.006      |
| Ni      | 0.004      |
| Pb      | 0.001      |
| Sb      | 0.002      |
| Se      | 0.139      |
| Sr      | 0.004      |
| Ti      | 0.010      |
| V       | 0.004      |
| Zn      | 0.013      |

**Table S3.** Results obtained in the analysis of the certified reference material ERM® – DB001  
Trace Element in Human Hair.

| <b>Element</b> | <b>Certified value ± uncertainty<br/>(µg/g)</b> | <b>Determined value ± standard<br/>deviation (µg/g)*</b> | <b>Recovery (%)</b> |
|----------------|-------------------------------------------------|----------------------------------------------------------|---------------------|
| As             | 0.044 ± 0.006                                   | 0.053 ± 0.006                                            | 121.0 ± 14.3        |
| Cd             | 0.125 ± 0.007                                   | 0.114 ± 0.003                                            | 91.0 ± 2.2          |
| Cu             | 33.000 ± 4.000                                  | 31.400 ± 0.600                                           | 95.1 ± 1.8          |
| Hg             | 0.365 ± 0.028                                   | 0.329 ± 0.020                                            | 90.2 ± 5.5          |
| Pb             | 2.140 ± 0.200                                   | 2.260 ± 0.080                                            | 105.8 ± 3.9         |
| Se             | 3.240 ± 0.240                                   | 3.210 ± 0.520                                            | 99.2 ± 8.9          |
| Zn             | 209.000 ± 12.000                                | 198.000 ± 2.400                                          | 94.6 ± 1.1          |

\* Data from two independent digestions of the certified reference material with triplicate analysis of the sample solutions (at the beginning, middle, and end of the analytical run).
